# Supplementary material for: Why a simple vanadate is inefficient as a catalyst in the oxidation of alkanes with H2O2 – the long-standing puzzle is solved
Source: Royal Society of Chemistry journal article supplement (doi:10.1039/d3dt00967j), 2023-01-01
Supplement: d3dt00967j1.pdf [file d3dt00967j1.pdf]

# Why simple vanadate is inefficient as a catalyst in oxidation of alkanes with H<sub>2</sub>O<sub>2</sub> – the long-standing puzzle is resolved

Maxim L. Kuznetsov\*<sup>a</sup> and Armando J. L. Pombeiro<sup>a</sup>

<sup>a</sup>Centro de Química Estrutural, Institute of Molecular Sciences, Departamento de Engenharia Química, Instituto Superior Técnico, Universidade de Lisboa, Av. Rovisco Pais, 1049-001 Lisboa, Portugal

## Electronic Supplementary Information

### Analysis of the HO• capture

Analysis of the HO• radical capture by the V atom during its liberation from **10•H<sub>2</sub>O** was performed in accord with the following procedure. First, the singlet biradical PES scan for the VO–OH cleavage in **10•H<sub>2</sub>O** was carried out. The VO–OH bond was increased with the step of 0.03 Å, all other internal coordinates being fully relaxed. Second, the point on the scan curve corresponding to the VO–OH distance of 1.789 Å – which is soon after the formation of **TS21** – was selected as the first point for the second singlet biradical PES scan. The V•••OH<sub>leaving</sub> distance was reduced with the step 0.06 Å with all other internal coordinates being fully relaxed. Results are presented on Figure 6.

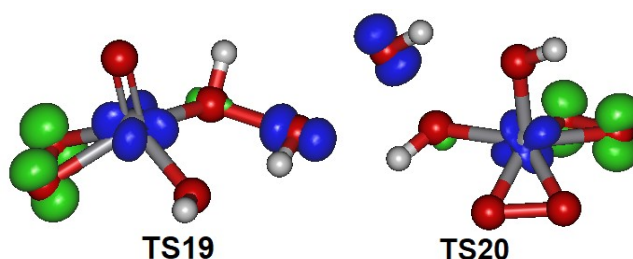

**Figure S1.** Equilibrium structures and plots of spin densities for **TS19** and **TS20**.

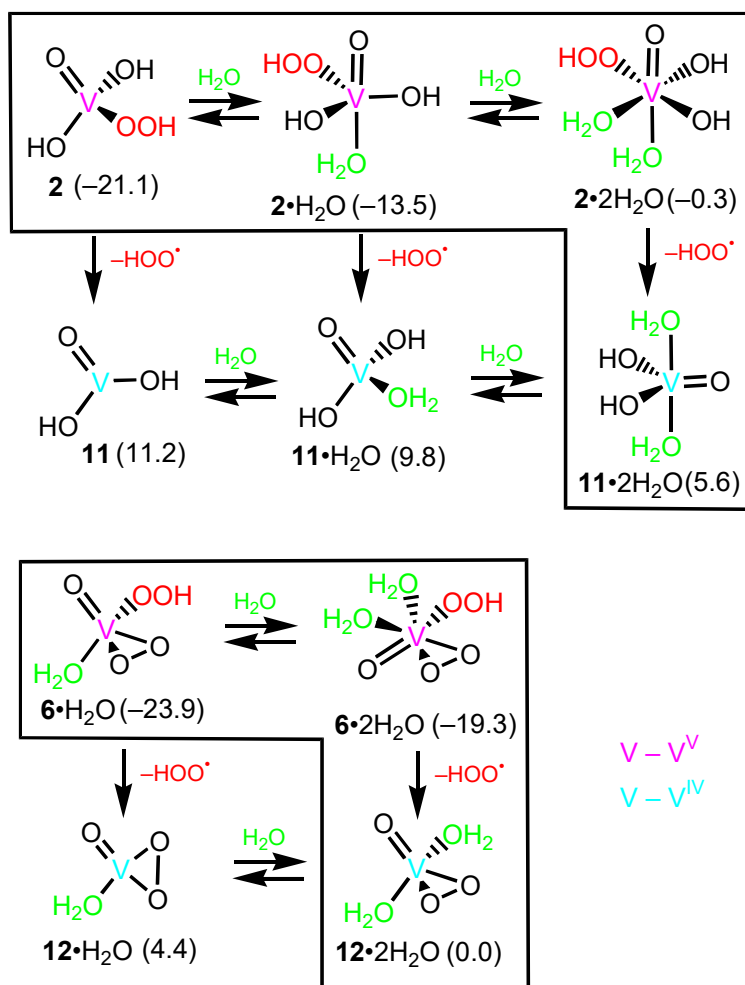

**Scheme S1.** Elimination of the HOO<sup>•</sup> radical from complexes **2** and **6•H<sub>2</sub>O** (Gibbs free energies are indicated in parentheses in kcal/mol relative to HVO<sub>3</sub>, the most favourable pathways are boxed).

**Table S1.** Cartesian atomic coordinates (in Å) of the calculated equilibrium structures (nuclear charges of the atoms are given in the first column).

**1**

|    |          |           |           |
|----|----------|-----------|-----------|
| 23 | 1.120915 | -0.547897 | -0.408714 |
| 8  | 0.667303 | -1.322031 | 0.909085  |
| 8  | 0.589615 | 1.159575  | -0.161173 |
| 8  | 0.285662 | -1.153424 | -1.622353 |
| 1  | 0.232995 | 1.604197  | -0.941687 |

**1•H<sub>2</sub>O**

|    |           |           |           |
|----|-----------|-----------|-----------|
| 23 | 0.372303  | -0.509690 | -0.477759 |
| 8  | -1.580614 | -1.005076 | -0.456949 |
| 8  | 0.946682  | -0.978483 | 0.933463  |
| 8  | 0.568404  | 1.248804  | -0.774838 |
| 8  | 1.004901  | -1.360152 | -1.671267 |
| 1  | -2.105099 | -1.017946 | -1.274748 |
| 1  | -2.166126 | -0.723426 | 0.265595  |
| 1  | 0.682468  | 1.819588  | -0.003107 |

**1•2H<sub>2</sub>O**

|    |           |           |           |
|----|-----------|-----------|-----------|
| 23 | -0.562276 | -0.267028 | -0.111632 |
| 8  | 0.208930  | -2.518491 | -0.282221 |
| 8  | -0.581110 | 1.285020  | 0.267877  |
| 8  | -1.547117 | -1.106670 | 1.172104  |
| 8  | 1.496059  | -0.293098 | -0.141840 |
| 1  | -0.238493 | -2.949683 | 0.459191  |
| 8  | -1.199632 | -0.442182 | -1.569194 |
| 1  | 1.947953  | -1.054206 | -0.535379 |
| 1  | 1.982038  | 0.513295  | -0.369183 |
| 1  | -0.221808 | -2.868358 | -1.073881 |
| 1  | -1.810944 | -0.542600 | 1.908836  |

**1•H<sub>2</sub>O<sub>2</sub>**

|    |           |           |           |
|----|-----------|-----------|-----------|
| 23 | -0.377008 | -0.864579 | 0.060889  |
| 8  | 1.547739  | -0.294385 | -0.297684 |
| 8  | -1.217425 | -0.335665 | -1.180426 |
| 8  | -0.960964 | -0.343780 | 1.666518  |
| 8  | -0.146843 | -2.449817 | -0.015292 |
| 8  | 2.465160  | -1.212472 | 0.277690  |
| 1  | -1.544109 | 0.426040  | 1.721852  |
| 1  | 2.012050  | -2.071690 | 0.132377  |
| 1  | 1.839920  | -0.195742 | -1.226926 |

**1•H<sub>2</sub>O<sub>2</sub>•H<sub>2</sub>O**

|    |           |           |           |
|----|-----------|-----------|-----------|
| 23 | 0.230662  | 0.400606  | -0.862944 |
| 8  | 0.173840  | -1.464781 | 0.035046  |
| 8  | 0.971519  | 1.667220  | -0.184230 |
| 8  | -1.534432 | 0.544429  | -0.535203 |
| 8  | 2.396201  | -0.476479 | -0.785454 |
| 1  | 0.954198  | -1.920703 | 0.383509  |
| 8  | 0.408449  | 0.398731  | -2.446619 |
| 1  | 2.722439  | -0.332912 | -1.691563 |
| 8  | 3.224003  | 0.377847  | -0.006860 |
| 1  | -0.606160 | -1.735295 | 0.541672  |
| 1  | -1.768102 | 1.014391  | 0.276735  |
| 1  | 2.602073  | 1.141577  | 0.095480  |

**1•2H<sub>2</sub>O<sub>2</sub>**

|    |          |          |          |
|----|----------|----------|----------|
| 23 | 0.102289 | 0.626648 | 0.235636 |
|----|----------|----------|----------|

|   |           |           |           |
|---|-----------|-----------|-----------|
| 8 | 0.261220  | -1.539475 | -0.093120 |
| 8 | 0.348113  | 1.706873  | 1.403852  |
| 8 | -1.693321 | 0.226555  | 0.252492  |
| 8 | 2.113223  | -0.081556 | 0.740030  |
| 1 | 0.555050  | -2.055031 | 0.681043  |
| 8 | 0.449043  | 1.269999  | -1.170452 |
| 1 | 2.747494  | 0.232398  | 0.067725  |
| 8 | 2.599635  | 0.500383  | 1.942370  |
| 8 | -0.979046 | -2.142060 | -0.443886 |
| 1 | -2.155951 | 0.434728  | 1.074899  |
| 1 | 1.911844  | 1.198383  | 2.071161  |
| 1 | -1.586214 | -1.396213 | -0.186321 |

**2**

|    |           |           |           |
|----|-----------|-----------|-----------|
| 23 | 0.185606  | -0.721072 | 1.086743  |
| 8  | 0.662986  | -1.628279 | 2.267710  |
| 8  | -1.172290 | -1.505732 | 0.275934  |
| 8  | 1.402938  | -0.772928 | -0.293187 |
| 8  | -0.399054 | 0.859852  | 1.630762  |
| 8  | 2.145043  | 0.064755  | 0.607443  |
| 1  | -1.386322 | -2.429233 | 0.473741  |
| 1  | 2.832113  | -0.536730 | 0.954882  |
| 1  | -0.316148 | 1.124280  | 2.557321  |

**2•H<sub>2</sub>O**

|    |           |           |           |
|----|-----------|-----------|-----------|
| 23 | -0.173186 | 0.437070  | 0.456320  |
| 8  | 0.770918  | 0.006262  | -1.021141 |
| 8  | -1.883644 | -0.074025 | 0.426726  |
| 8  | -0.180995 | 1.995744  | 0.281669  |
| 8  | -0.016853 | -1.944103 | 0.503379  |
| 8  | 0.662786  | 0.211463  | 2.016128  |
| 8  | 1.344854  | 0.987606  | -1.852008 |
| 1  | 0.744956  | -0.728729 | 2.239484  |
| 1  | -0.896815 | -2.305710 | 0.330932  |
| 1  | 0.555910  | -2.319682 | -0.178585 |
| 1  | 0.971713  | 1.821087  | -1.510185 |
| 1  | -2.551463 | 0.620907  | 0.349691  |

**3•H<sub>2</sub>O**

|    |           |           |           |
|----|-----------|-----------|-----------|
| 23 | 0.804071  | -0.997008 | -0.119593 |
| 8  | 2.605144  | -0.625424 | 0.222630  |
| 8  | -0.699553 | 0.387363  | -0.122605 |
| 8  | 0.308679  | -2.159520 | 0.850164  |
| 8  | 0.672745  | -1.455502 | -1.645022 |
| 1  | -1.066532 | 0.680192  | 0.727718  |
| 1  | -1.455478 | 0.184277  | -0.698084 |
| 8  | 1.944370  | 0.464731  | 0.891414  |
| 1  | 2.041011  | 0.245877  | 1.839042  |

**3•2H<sub>2</sub>O**

|    |           |           |           |
|----|-----------|-----------|-----------|
| 23 | 0.440954  | -0.883096 | 0.597068  |
| 8  | 0.157496  | -2.446394 | 0.398539  |
| 8  | 0.810607  | 1.388503  | -0.011013 |
| 8  | 2.242636  | -0.793563 | 1.086999  |
| 8  | -0.664555 | -0.420748 | -1.101581 |
| 8  | -0.399072 | -0.361602 | 1.855408  |
| 1  | 1.755895  | 1.581312  | -0.072364 |
| 1  | 0.492276  | 1.913805  | 0.735608  |

|   |           |           |           |
|---|-----------|-----------|-----------|
| 1 | -0.414653 | 0.398429  | -1.554945 |
| 1 | -0.771623 | -1.118087 | -1.762807 |
| 8 | 2.443097  | -0.818904 | -0.338932 |
| 1 | 2.707452  | -1.741984 | -0.507060 |

**4**

|    |           |           |           |
|----|-----------|-----------|-----------|
| 23 | 0.206109  | -0.391782 | -0.042144 |
| 8  | 0.720102  | -0.231348 | 1.429735  |
| 8  | -1.511474 | 0.201168  | -0.285423 |
| 8  | -1.390279 | -1.184647 | 0.009034  |
| 8  | 1.153685  | -1.626390 | -0.917859 |
| 1  | 1.986778  | -1.937629 | -0.532588 |

**4•H<sub>2</sub>O**

|    |           |           |           |
|----|-----------|-----------|-----------|
| 8  | 1.592641  | -0.940162 | 0.884101  |
| 23 | 0.427867  | 0.301378  | -0.273466 |
| 8  | 0.697434  | 1.661770  | 0.465820  |
| 8  | -1.118213 | -0.449322 | 0.170563  |
| 8  | 1.581350  | -0.244254 | -1.593369 |
| 1  | -1.677731 | -0.054276 | 0.855313  |
| 8  | 0.509578  | 0.571211  | -2.041935 |
| 1  | 1.598071  | -0.748179 | 1.836839  |
| 1  | 2.523063  | -1.002836 | 0.612326  |

**4•H<sub>2</sub>O<sub>2</sub>**

|    |           |           |           |
|----|-----------|-----------|-----------|
| 8  | -0.904856 | -0.182375 | 0.693326  |
| 23 | 0.738185  | 0.995592  | 0.250340  |
| 8  | 0.018404  | 2.364764  | -0.017349 |
| 8  | 1.178290  | 0.089953  | -1.210417 |
| 8  | 1.140374  | 0.540177  | 1.983170  |
| 1  | 0.916265  | 0.410570  | -2.085856 |
| 8  | 2.155000  | 1.268768  | 1.310026  |
| 8  | -1.919867 | -0.056814 | -0.292181 |
| 1  | -1.365481 | 0.039394  | 1.526443  |
| 1  | -1.993653 | -0.981207 | -0.596476 |

**5**

|    |           |           |           |
|----|-----------|-----------|-----------|
| 23 | 0.546152  | -0.475571 | 0.489624  |
| 8  | 0.822167  | -2.172780 | 0.885024  |
| 8  | 2.208215  | 0.086627  | 0.468073  |
| 8  | -0.386291 | 0.850872  | 1.185965  |
| 8  | -0.195205 | -0.572183 | -1.098540 |
| 8  | -0.461346 | -0.309900 | 1.996690  |
| 1  | 2.381378  | 1.013459  | 0.230506  |
| 1  | 0.366616  | -2.639280 | 1.599139  |
| 1  | -0.010966 | -1.337245 | -1.667542 |

**5•H<sub>2</sub>O**

|    |           |           |           |
|----|-----------|-----------|-----------|
| 23 | 0.417661  | -0.485162 | 0.259826  |
| 8  | 0.940364  | 1.753577  | 0.117597  |
| 8  | 0.797206  | -2.246320 | 0.072420  |
| 8  | 1.599578  | -0.304324 | 1.568085  |
| 8  | -1.111083 | 0.328655  | 0.681157  |
| 8  | 0.817732  | -0.195947 | -1.459814 |
| 8  | -1.231193 | -1.058795 | 0.750605  |
| 1  | 0.234729  | 2.363277  | 0.379884  |
| 1  | 1.095032  | 1.920226  | -0.824621 |
| 1  | 1.902803  | 0.611439  | 1.670520  |
| 1  | 0.081377  | -2.875201 | 0.224658  |

|   |          |           |           |
|---|----------|-----------|-----------|
| 1 | 0.876723 | -1.011935 | -1.975336 |
|---|----------|-----------|-----------|

### 6•H<sub>2</sub>O

|    |           |           |           |
|----|-----------|-----------|-----------|
| 8  | -0.724546 | 0.724779  | 1.078148  |
| 23 | 0.657474  | 0.310237  | -0.121820 |
| 8  | 0.008673  | 0.107814  | -1.531087 |
| 8  | 1.831028  | -1.390877 | 0.058778  |
| 8  | 1.225311  | 2.041506  | 0.010445  |
| 8  | 2.265467  | 1.139174  | -0.316242 |
| 8  | -0.642466 | -0.708175 | 1.083862  |
| 1  | -0.240323 | -0.917266 | 1.951201  |
| 1  | 1.485722  | -2.206130 | -0.341412 |
| 1  | 2.748710  | -1.300482 | -0.244653 |

### 7

|    |           |           |           |
|----|-----------|-----------|-----------|
| 8  | -0.747309 | -0.169406 | -0.812959 |
| 23 | 0.739986  | 0.270468  | 0.162969  |
| 8  | 1.993655  | 0.375968  | -0.764695 |
| 8  | 1.011812  | -0.855950 | 1.519021  |
| 1  | 1.866881  | -1.298269 | 1.608678  |
| 8  | 0.732323  | 1.779991  | 1.227490  |
| 8  | -0.164105 | -1.456837 | -1.010840 |
| 1  | -0.615292 | -2.009104 | -0.344895 |
| 8  | -0.000885 | 2.206533  | 0.074732  |
| 1  | 0.631353  | 2.775987  | -0.409590 |

### 8

|    |           |           |           |
|----|-----------|-----------|-----------|
| 8  | 0.748477  | 0.240027  | 1.466615  |
| 23 | 0.405216  | 0.201627  | -0.317842 |
| 8  | -1.309342 | -0.134230 | -0.431523 |
| 8  | 1.580941  | -0.930930 | -0.982927 |
| 8  | 0.864961  | 1.953648  | -0.222370 |
| 1  | 1.502534  | -1.885306 | -0.822247 |
| 8  | 0.553888  | 1.489414  | -1.520560 |
| 8  | 0.317990  | -1.113253 | 1.520910  |
| 1  | 1.151540  | -1.607029 | 1.651425  |
| 1  | -1.716165 | -0.729678 | 0.219479  |

### 9•H<sub>2</sub>O

|    |           |           |           |
|----|-----------|-----------|-----------|
| 8  | -0.810747 | 0.007488  | 1.576405  |
| 23 | 0.599996  | 0.113779  | 0.450640  |
| 8  | 0.935369  | 1.787055  | 0.083515  |
| 8  | 0.673470  | -0.382445 | -1.582374 |
| 8  | 1.702700  | -0.423353 | 1.780777  |
| 8  | 2.129068  | -0.821591 | 0.496277  |
| 8  | -1.147611 | -0.222403 | 0.227662  |
| 1  | -0.028370 | 0.002768  | -2.131603 |
| 1  | 1.510964  | -0.183512 | -2.031457 |
| 1  | 1.052471  | 2.394104  | 0.833839  |

### 9•H<sub>2</sub>O<sub>2</sub>

|    |           |           |           |
|----|-----------|-----------|-----------|
| 8  | -0.538207 | -2.589321 | 0.107532  |
| 23 | 0.890076  | -1.485644 | 0.097831  |
| 8  | 1.225738  | -0.775247 | 1.671471  |
| 8  | 0.995730  | 0.525963  | -0.598868 |
| 8  | 1.995015  | -2.888619 | -0.188890 |
| 8  | 2.405893  | -1.688114 | -0.809283 |
| 8  | -0.833680 | -1.282915 | -0.323756 |
| 1  | 0.155236  | 1.016650  | -0.512367 |

|   |          |           |          |
|---|----------|-----------|----------|
| 8 | 1.926376 | 1.330949  | 0.107429 |
| 1 | 1.479985 | -1.339055 | 2.421368 |
| 1 | 1.906077 | 0.915562  | 0.996073 |

### 10•H<sub>2</sub>O

|    |           |           |           |
|----|-----------|-----------|-----------|
| 8  | 0.937455  | -0.679037 | -1.982473 |
| 23 | 0.729595  | -0.413925 | -0.235797 |
| 8  | -0.484140 | 1.156940  | -0.930050 |
| 8  | 1.698011  | 0.923921  | 0.497307  |
| 8  | -0.740008 | -0.799398 | 0.655933  |
| 8  | 0.328644  | -1.565722 | 1.167086  |
| 8  | 1.402486  | -1.783137 | -1.242219 |
| 8  | 2.665501  | -0.102660 | 0.688787  |
| 1  | -0.116703 | 1.700361  | -1.646066 |
| 1  | 2.566898  | -0.334355 | 1.634781  |
| 1  | -0.809500 | 1.775172  | -0.255399 |

### 11

|    |          |           |           |
|----|----------|-----------|-----------|
| 23 | 0.901156 | -1.102806 | -0.530150 |
| 8  | 2.634800 | -1.483771 | -0.076236 |
| 8  | 1.042833 | 0.734844  | -0.583900 |
| 8  | 0.603630 | -1.668824 | -1.981752 |
| 1  | 0.436669 | 1.178793  | -1.189809 |
| 1  | 3.289213 | -0.809157 | -0.291834 |

### 11•H<sub>2</sub>O

|    |           |           |           |
|----|-----------|-----------|-----------|
| 23 | 1.139955  | -0.952948 | -0.915265 |
| 8  | 0.259981  | -1.069818 | 0.917717  |
| 8  | 2.860965  | -1.375012 | -0.446874 |
| 8  | 0.746431  | 0.806527  | -1.266444 |
| 8  | 0.375130  | -2.017625 | -1.815066 |
| 1  | -0.298031 | -0.351058 | 1.253683  |
| 1  | 0.746870  | -1.435923 | 1.672521  |
| 1  | 0.518704  | 1.438882  | -0.575487 |
| 1  | 3.267116  | -1.050744 | 0.365455  |

### 11•2H<sub>2</sub>O

|    |           |           |           |
|----|-----------|-----------|-----------|
| 23 | 0.356750  | -0.017993 | 0.292446  |
| 8  | -0.293116 | -1.715656 | -0.140165 |
| 8  | -0.731818 | 1.467751  | 0.606520  |
| 8  | 0.120768  | 0.202786  | -1.795729 |
| 8  | -0.094468 | -0.322492 | 2.333152  |
| 8  | 1.936122  | 0.174821  | 0.398221  |
| 1  | 0.657040  | -0.499150 | 2.918491  |
| 1  | -0.482241 | 0.517515  | 2.627963  |
| 1  | 0.882165  | 0.554945  | -2.277546 |
| 1  | -0.018715 | -0.700862 | -2.122718 |
| 1  | -1.008342 | 1.981350  | -0.159603 |
| 1  | -0.540165 | -2.292744 | 0.589988  |

### 11•H<sub>2</sub>O<sub>2</sub>•H<sub>2</sub>O

|    |           |           |           |
|----|-----------|-----------|-----------|
| 23 | -0.130667 | 0.120149  | -0.081562 |
| 8  | 1.062007  | 0.206356  | 1.329456  |
| 8  | 0.444560  | 0.117996  | -1.836304 |
| 8  | 0.103251  | 2.255677  | 0.106298  |
| 8  | 0.034210  | -1.942847 | -0.280021 |
| 8  | -1.700553 | 0.312047  | 0.221314  |
| 1  | -0.576957 | -2.517760 | 0.204770  |
| 1  | -0.018163 | -2.200472 | -1.214434 |

|   |           |           |           |
|---|-----------|-----------|-----------|
| 8 | -1.152493 | 2.925459  | 0.108656  |
| 1 | 0.430695  | 2.366715  | 1.019409  |
| 1 | 0.530597  | 0.965793  | -2.286508 |
| 1 | 1.552987  | -0.584089 | 1.580311  |
| 1 | -1.749815 | 2.146515  | 0.204525  |

### 12•H<sub>2</sub>O

|    |           |           |           |
|----|-----------|-----------|-----------|
| 23 | 0.128073  | 0.538729  | -0.077015 |
| 8  | -0.644284 | 0.976922  | -1.399899 |
| 8  | 1.586382  | -0.870443 | -0.686498 |
| 8  | 0.129506  | 1.695686  | 1.356198  |
| 8  | 1.351584  | 1.706222  | 0.591962  |
| 1  | 1.473152  | -1.338445 | -1.528142 |
| 1  | 2.499567  | -0.543951 | -0.674836 |

### 12•2H<sub>2</sub>O

|    |           |           |           |
|----|-----------|-----------|-----------|
| 23 | 0.402795  | 0.161480  | -0.712832 |
| 8  | 0.350383  | -0.997650 | -1.807586 |
| 8  | 1.724372  | -0.411579 | 0.810768  |
| 8  | -0.131509 | 1.852063  | -1.194236 |
| 8  | 1.307549  | 1.710500  | -1.108622 |
| 1  | 1.755893  | -1.329404 | 1.122567  |
| 1  | 2.646106  | -0.127257 | 0.711693  |
| 8  | -1.152612 | -0.119120 | 0.661249  |
| 1  | -1.351505 | -0.990203 | 1.037335  |
| 1  | -2.005893 | 0.290431  | 0.452016  |

### 13•H<sub>2</sub>O

|    |           |           |           |
|----|-----------|-----------|-----------|
| 8  | -1.091040 | -0.711240 | -1.670114 |
| 23 | 0.149118  | -0.411711 | -0.312477 |
| 8  | -0.884753 | 1.402393  | 0.016853  |
| 8  | -0.765372 | -1.419055 | 0.940582  |
| 8  | 0.588798  | -1.823792 | 0.697005  |
| 8  | 0.228317  | -0.362307 | -2.093610 |
| 1  | -1.498935 | 1.532666  | -0.724044 |
| 1  | -0.415863 | 2.242246  | 0.146976  |

### 13•H<sub>2</sub>O<sub>2</sub>

|    |           |           |           |
|----|-----------|-----------|-----------|
| 8  | 1.893378  | -0.777116 | -0.528674 |
| 23 | 0.583261  | -0.742865 | 0.853594  |
| 8  | 0.679854  | 1.410242  | 0.546963  |
| 8  | -0.836748 | -0.804478 | -0.332605 |
| 8  | -0.891093 | -1.735917 | 0.745494  |
| 8  | 2.274524  | -1.296430 | 0.738360  |
| 1  | 0.065116  | 1.665513  | -0.167127 |
| 8  | 1.963552  | 1.751624  | 0.033852  |
| 1  | 2.216596  | 0.867098  | -0.361878 |

### 13•H<sub>2</sub>O<sub>2</sub>•H<sub>2</sub>O

|    |           |           |           |
|----|-----------|-----------|-----------|
| 8  | -0.451439 | -1.474417 | 0.774679  |
| 23 | 0.230424  | -0.302488 | -0.490444 |
| 8  | 2.230177  | -0.416862 | 0.174886  |
| 8  | 0.558967  | 1.807264  | -0.434382 |
| 8  | 0.498969  | -1.504251 | -1.881774 |
| 8  | -0.341753 | -0.370728 | -2.169846 |
| 8  | -0.661972 | -0.077460 | 1.045430  |
| 1  | 0.428632  | 2.303014  | 0.396100  |
| 8  | 1.816182  | 2.247325  | -0.922187 |
| 1  | 2.757005  | -1.075051 | -0.309292 |



|   |          |           |           |
|---|----------|-----------|-----------|
| 1 | 2.444725 | 1.665901  | -0.451797 |
| 1 | 2.307733 | -0.659267 | 1.114326  |

### 14•H<sub>2</sub>O

|    |           |           |           |
|----|-----------|-----------|-----------|
| 23 | -0.269209 | 0.768828  | -0.043296 |
| 8  | -0.567328 | -1.116577 | -0.128335 |
| 8  | 1.346362  | 1.672933  | -0.302592 |
| 8  | 0.189964  | 0.433292  | 1.943105  |
| 8  | -0.066224 | 0.511793  | -2.111811 |
| 8  | -1.583249 | 1.649794  | 0.067303  |
| 8  | -0.698814 | -1.799533 | 1.132131  |
| 1  | -0.013993 | -0.535241 | 2.010655  |
| 1  | -0.093199 | -2.548345 | 1.011608  |
| 1  | -0.095833 | -0.405220 | -2.425724 |
| 1  | 0.807061  | 0.863614  | -2.348665 |
| 1  | 1.111234  | 0.562060  | 2.207463  |
| 1  | 1.739377  | 2.182623  | 0.413447  |

### 15•H<sub>2</sub>O

|    |           |           |           |
|----|-----------|-----------|-----------|
| 23 | 0.062693  | -0.111041 | 0.371132  |
| 8  | 0.204934  | -0.374630 | -1.186911 |
| 8  | 1.666329  | 0.226111  | 1.262136  |
| 8  | -1.616527 | 0.372649  | 1.101925  |
| 8  | -0.965114 | 1.620108  | 0.760172  |
| 8  | 2.048453  | 1.559284  | 0.889687  |
| 8  | 0.159945  | -1.956478 | 1.277866  |
| 1  | 1.038063  | -2.363153 | 1.353472  |
| 1  | -0.448320 | -2.659674 | 1.000684  |
| 1  | 2.730021  | 1.390550  | 0.219886  |
| 1  | -0.718887 | 2.008814  | 1.620771  |

### 16•H<sub>2</sub>O

|    |           |           |           |
|----|-----------|-----------|-----------|
| 23 | -0.224561 | -0.791908 | 0.260504  |
| 8  | -1.148263 | 0.705958  | 0.079953  |
| 8  | 1.560341  | -0.608642 | -0.043373 |
| 8  | -0.990230 | -2.269427 | 0.970816  |
| 8  | -0.239054 | -1.496412 | 1.923126  |
| 8  | 2.146844  | 0.105428  | 1.044445  |
| 8  | -0.239777 | -1.603928 | -1.650845 |
| 1  | -0.794765 | -2.381431 | -1.821387 |
| 1  | 0.617926  | -1.779987 | -2.069694 |
| 1  | 2.512396  | -0.615587 | 1.584216  |
| 1  | -0.826188 | 1.488395  | -0.387421 |

### 17•H<sub>2</sub>O

|    |           |           |           |
|----|-----------|-----------|-----------|
| 8  | -0.523783 | 0.410618  | 1.217260  |
| 23 | -0.243382 | -1.127632 | 0.267146  |
| 8  | 1.600725  | -1.418809 | 1.178972  |
| 8  | 0.643420  | -0.766914 | -1.285122 |
| 8  | -0.597094 | -2.843238 | 0.703241  |
| 8  | -1.666267 | -2.228070 | -0.024976 |
| 8  | -1.419995 | 0.598573  | 0.107390  |
| 8  | 2.047007  | -1.044405 | -1.339733 |
| 1  | 2.225603  | -1.428415 | 0.422258  |
| 1  | 2.408874  | -0.176054 | -1.586632 |
| 1  | 1.731045  | -2.239355 | 1.677913  |
| 1  | -0.976312 | 1.283521  | -0.431117 |

|    |           |           |           |
|----|-----------|-----------|-----------|
| 23 | 0.476368  | 0.694453  | -1.120218 |
| 8  | 0.790287  | 2.413414  | -1.352737 |
| 8  | -1.040668 | 0.402923  | -0.257359 |
| 8  | 1.852656  | -0.082537 | -0.354079 |
| 8  | 0.282563  | 0.257309  | -2.618651 |
| 1  | 2.481654  | -0.644117 | -0.831649 |
| 1  | -1.034697 | 0.530442  | 0.705929  |

### 19•H<sub>2</sub>O

|    |           |           |           |
|----|-----------|-----------|-----------|
| 8  | 1.835950  | 0.227273  | 0.059947  |
| 23 | 0.292985  | 0.444391  | 0.391742  |
| 8  | -0.004891 | 0.256997  | 1.943863  |
| 8  | -0.491894 | -1.212554 | -0.508592 |
| 8  | -0.147253 | 2.285737  | -0.048984 |
| 8  | -0.942923 | 1.542305  | -0.756480 |
| 1  | -0.003854 | -2.041601 | -0.369092 |
| 1  | -1.431460 | -1.418019 | -0.366114 |

### 20•H<sub>2</sub>O

|    |           |           |           |
|----|-----------|-----------|-----------|
| 8  | 0.674960  | -0.720623 | -2.204855 |
| 23 | 0.846243  | -0.364988 | -0.429537 |
| 8  | -0.258967 | 1.313200  | -0.930041 |
| 8  | 2.229301  | 0.289173  | -0.120468 |
| 8  | -0.161262 | -0.404330 | 1.258841  |
| 8  | 0.525863  | -1.490364 | 1.144963  |
| 8  | 1.050482  | -1.850989 | -1.446065 |
| 1  | -0.732898 | 1.836386  | -0.264602 |
| 1  | -0.835275 | 1.237739  | -1.706977 |

### 21•H<sub>2</sub>O

|    |           |           |           |
|----|-----------|-----------|-----------|
| 23 | 0.369694  | 0.276505  | -1.006171 |
| 8  | 0.057055  | -1.658021 | -0.154578 |
| 8  | 1.029362  | 1.907969  | -0.781870 |
| 8  | -1.275581 | 0.633145  | -0.360787 |
| 8  | 2.089944  | -0.154710 | -0.499809 |
| 1  | 0.816466  | -2.021810 | 0.325574  |
| 8  | 0.171721  | 0.046203  | -2.544678 |
| 1  | 2.756238  | -0.062265 | -1.197204 |
| 1  | -0.733071 | -1.796848 | 0.388715  |
| 1  | -1.333215 | 0.925039  | 0.561755  |

### 22

|    |           |           |           |
|----|-----------|-----------|-----------|
| 8  | -0.682105 | 0.364251  | 0.478029  |
| 23 | 0.416994  | -1.003790 | 0.212407  |
| 8  | 0.414185  | -1.942151 | 1.448207  |
| 8  | 2.023162  | -0.280322 | -0.001999 |
| 8  | -0.712292 | -1.882205 | -1.143917 |
| 1  | 2.764273  | -0.595631 | 0.536471  |
| 8  | 0.531997  | -2.187161 | -1.360034 |
| 1  | -1.229580 | 0.384798  | 1.276913  |

### 23

|    |           |           |           |
|----|-----------|-----------|-----------|
| 8  | -0.383157 | -2.500032 | -0.050398 |
| 23 | 0.781251  | -1.177319 | 0.203365  |
| 8  | 1.110639  | -0.947974 | 1.900363  |
| 8  | 0.919731  | 0.490696  | -0.379120 |
| 8  | 2.221882  | -2.545313 | 0.027503  |
| 8  | 2.130963  | -1.829553 | -1.043655 |
| 8  | -0.977059 | -1.215311 | -0.094006 |

|   |          |           |           |
|---|----------|-----------|-----------|
| 1 | 0.377618 | 0.844494  | -1.100668 |
| 1 | 1.593918 | -1.625991 | 2.401654  |

**<sup>3</sup>24**

|    |           |           |           |
|----|-----------|-----------|-----------|
| 8  | 2.387124  | -0.530273 | -1.547889 |
| 23 | 1.427157  | -0.370983 | 0.179625  |
| 8  | 1.288327  | 1.160532  | 0.380518  |
| 8  | -0.327298 | -1.086948 | 0.613444  |
| 8  | 0.378865  | -1.075969 | 1.692094  |
| 8  | 1.119396  | -0.693432 | -1.707468 |
| 8  | 2.942955  | -1.006456 | 0.935668  |
| 1  | 2.967514  | -1.026737 | 1.902524  |

**1,124**

|    |           |           |           |
|----|-----------|-----------|-----------|
| 8  | 2.385959  | -0.525505 | -1.548556 |
| 23 | 1.427775  | -0.370281 | 0.180093  |
| 8  | 1.289144  | 1.161278  | 0.381177  |
| 8  | -0.324785 | -1.090138 | 0.610753  |
| 8  | 0.376433  | -1.071119 | 1.692584  |
| 8  | 1.118930  | -0.698046 | -1.704789 |
| 8  | 2.942384  | -1.007992 | 0.935202  |
| 1  | 2.968201  | -1.028463 | 1.902052  |

**25•H<sub>2</sub>O<sub>2</sub>•H<sub>2</sub>O**

|    |           |           |           |
|----|-----------|-----------|-----------|
| 8  | 2.026390  | 0.552842  | 0.125397  |
| 23 | 0.326048  | -0.397970 | 0.992236  |
| 8  | 0.556770  | -1.009224 | 2.438057  |
| 8  | 0.597827  | -1.855147 | -0.453008 |
| 8  | -0.551819 | 1.240381  | 0.834659  |
| 1  | 1.426323  | -2.353681 | -0.530472 |
| 8  | -1.351986 | 0.104988  | 0.436739  |
| 1  | 2.588282  | 1.062046  | 0.739193  |
| 8  | 1.492563  | 1.553214  | -0.746015 |
| 1  | -0.121636 | -2.471552 | -0.659911 |
| 1  | 0.592218  | 1.686043  | -0.318406 |

**TS1**

|    |           |           |           |
|----|-----------|-----------|-----------|
| 23 | -0.121921 | -0.967974 | 0.861734  |
| 8  | 0.735981  | -2.571028 | -0.266657 |
| 8  | 0.559685  | -1.050792 | 2.287152  |
| 8  | -1.579102 | -2.041623 | 0.881623  |
| 8  | 1.517922  | -0.206889 | -0.114456 |
| 1  | 1.705176  | -2.456300 | -0.269334 |
| 8  | -0.755560 | 0.555244  | 0.619512  |
| 1  | 1.533814  | 1.094720  | 0.155022  |
| 8  | 2.735683  | -0.899510 | 0.142334  |
| 1  | 0.536529  | -3.471426 | 0.022629  |
| 1  | -1.597284 | -2.748179 | 1.538996  |
| 1  | 2.815451  | -0.851470 | 1.112560  |
| 1  | 0.113724  | 1.567714  | 0.588803  |
| 8  | 1.072289  | 2.079851  | 0.382799  |
| 1  | 1.434493  | 2.418943  | 1.216732  |

**TS2**

|    |           |           |           |
|----|-----------|-----------|-----------|
| 23 | 1.003404  | -0.736582 | -0.056828 |
| 8  | 2.056090  | 0.680645  | -0.962922 |
| 8  | -0.493708 | -1.580884 | 1.212251  |
| 8  | 2.080026  | -0.831736 | 1.138540  |
| 8  | -0.470423 | 0.546006  | -0.331795 |

|   |           |           |           |
|---|-----------|-----------|-----------|
| 1 | 1.475310  | 1.860024  | -0.846143 |
| 8 | 1.140734  | -1.988287 | -1.026132 |
| 1 | -0.343939 | -2.511338 | 1.440332  |
| 1 | -1.397815 | -1.530431 | 0.866397  |
| 1 | -1.147892 | 0.302625  | -0.975962 |
| 8 | 3.414051  | 0.793451  | -0.548348 |
| 1 | 3.383012  | 0.324178  | 0.309038  |
| 8 | 0.656188  | 2.605484  | -0.752757 |
| 1 | -0.046982 | 1.761593  | -0.519436 |
| 1 | 0.797164  | 3.146721  | 0.039196  |

**TS3**

|    |           |           |           |
|----|-----------|-----------|-----------|
| 23 | 0.233213  | -1.151667 | -0.374497 |
| 8  | 0.300611  | -2.289213 | 1.056266  |
| 8  | 1.780040  | -0.136046 | -0.734453 |
| 8  | -0.882950 | 0.042698  | -0.148602 |
| 8  | -0.146432 | -2.056598 | -1.619137 |
| 1  | 1.357682  | 1.167386  | -0.504527 |
| 1  | 2.253535  | -0.284617 | -1.563384 |
| 8  | 0.827630  | -1.255854 | 1.903885  |
| 1  | 0.046068  | -0.989455 | 2.421215  |
| 8  | 0.692136  | 1.961048  | -0.178913 |
| 1  | -0.146193 | 1.336584  | -0.107533 |
| 1  | 0.551000  | 2.591693  | -0.906259 |

**TS4**

|    |           |           |           |
|----|-----------|-----------|-----------|
| 23 | 0.284142  | -1.476641 | -0.269661 |
| 8  | -0.785130 | -0.225466 | -0.370289 |
| 8  | -0.386898 | -2.619108 | 0.928302  |
| 8  | 1.685260  | -1.169341 | 0.837067  |
| 8  | 0.406664  | -2.445030 | -1.746916 |
| 8  | 1.854969  | -0.451052 | -0.390600 |
| 1  | 0.094137  | -2.847756 | 1.733625  |
| 1  | 1.335589  | 1.050481  | -0.137970 |
| 1  | -0.039733 | -2.134779 | -2.549752 |
| 8  | 0.566408  | 1.703089  | 0.004232  |
| 1  | -0.240920 | 0.899697  | -0.186443 |
| 1  | 0.583503  | 2.356034  | -0.716435 |

**TS5**

|    |           |           |           |
|----|-----------|-----------|-----------|
| 23 | 0.484105  | -1.488612 | -0.172468 |
| 8  | -0.632411 | -0.206618 | -1.032320 |
| 8  | -0.263094 | -1.639685 | 1.200447  |
| 8  | 2.221004  | -1.235609 | 0.297469  |
| 8  | 0.298017  | -3.017154 | -1.048460 |
| 8  | 1.872212  | -0.195753 | -0.604023 |
| 1  | 1.372381  | 0.948232  | -0.172160 |
| 1  | 0.702684  | -3.054729 | -1.930739 |
| 8  | 0.570174  | 1.726213  | -0.122124 |
| 1  | -0.143306 | 1.095549  | -0.572492 |
| 1  | -1.568522 | -0.366692 | -0.851042 |
| 1  | 0.775437  | 2.471418  | -0.710658 |

**TS6**

|    |           |           |           |
|----|-----------|-----------|-----------|
| 8  | 1.236126  | -0.774494 | -0.632508 |
| 23 | -0.576082 | -0.832253 | 0.035576  |
| 8  | -1.396357 | -1.230167 | -1.244894 |
| 8  | -0.578905 | 1.042788  | 0.309105  |

|   |           |           |           |
|---|-----------|-----------|-----------|
| 8 | -0.014949 | -2.170447 | 1.153686  |
| 1 | -1.305720 | 1.543374  | -0.091188 |
| 8 | -1.321637 | -1.682457 | 1.413850  |
| 8 | 2.259503  | -1.526708 | -0.012849 |
| 1 | 1.722012  | 0.620411  | -0.543665 |
| 1 | 2.459402  | -2.181723 | -0.702029 |
| 8 | 1.685119  | 1.627123  | -0.270289 |
| 1 | 0.631440  | 1.585838  | 0.015872  |
| 1 | 1.799988  | 2.179947  | -1.062835 |

**TS7**

|    |           |           |           |
|----|-----------|-----------|-----------|
| 8  | 1.373942  | 0.685927  | -0.020334 |
| 23 | 0.011652  | -0.655568 | 0.200102  |
| 8  | -0.095642 | -0.711564 | 1.764171  |
| 8  | 0.701843  | -2.129548 | -0.503107 |
| 8  | -0.957393 | 0.661557  | -0.813077 |
| 1  | 1.003074  | -2.848951 | 0.068582  |
| 8  | -1.705393 | -0.455325 | -0.364957 |
| 8  | 2.482092  | 0.343792  | 0.802398  |
| 1  | 0.728833  | 1.947743  | 0.335802  |
| 1  | 3.130943  | 0.053342  | 0.139168  |
| 8  | -0.132069 | 2.549017  | 0.442040  |
| 1  | -0.783650 | 1.857518  | -0.046535 |
| 1  | -0.045982 | 3.363629  | -0.084412 |

**TS8**

|    |           |           |           |
|----|-----------|-----------|-----------|
| 8  | 1.361680  | -0.050889 | 0.243260  |
| 23 | -0.065506 | -1.213370 | -0.278321 |
| 8  | -0.988385 | 0.059970  | -0.744282 |
| 8  | -0.536281 | -1.938298 | 1.263869  |
| 8  | 1.128035  | -2.001383 | -1.410482 |
| 1  | -1.064495 | -1.433855 | 1.901085  |
| 8  | -0.182988 | -2.535162 | -1.468897 |
| 8  | 2.682500  | -0.536948 | 0.274443  |
| 1  | 1.065145  | 1.389715  | -0.274255 |
| 1  | 2.938188  | -0.537698 | -0.664088 |
| 8  | 0.362964  | 2.040965  | -0.641106 |
| 1  | -0.394350 | 1.262917  | -0.809874 |
| 1  | 0.678913  | 2.392596  | -1.492834 |

**TS9**

|    |           |           |           |
|----|-----------|-----------|-----------|
| 8  | 2.305937  | 0.110675  | 0.505161  |
| 23 | 0.691752  | -0.400992 | -0.172429 |
| 8  | 0.829430  | -1.518848 | -1.261307 |
| 8  | -0.562762 | 0.917782  | -0.805637 |
| 1  | -1.493611 | 0.712326  | -0.656417 |
| 8  | -0.658614 | -0.873409 | 1.023132  |
| 8  | 2.005755  | 0.965711  | -0.581864 |
| 1  | 1.455129  | 2.102922  | -0.238234 |
| 8  | 0.480969  | -1.618850 | 1.453245  |
| 1  | 0.299856  | -2.531857 | 1.148561  |
| 8  | 0.650067  | 2.877695  | -0.112213 |
| 1  | -0.098415 | 2.183648  | -0.443811 |
| 1  | 0.759156  | 3.585617  | -0.767466 |

**TS10**

|    |           |           |           |
|----|-----------|-----------|-----------|
| 8  | 1.019934  | -0.374628 | -1.832948 |
| 23 | -0.295974 | 0.104372  | -0.656394 |

|   |           |           |           |
|---|-----------|-----------|-----------|
| 8 | -0.173353 | 1.737418  | -0.512295 |
| 8 | -0.355434 | -0.419281 | 1.365188  |
| 8 | -1.554683 | -0.304657 | -1.913151 |
| 8 | -2.026737 | -0.422924 | -0.581788 |
| 8 | 1.511213  | -0.414898 | -0.494360 |
| 1 | 0.383603  | -0.122215 | 1.918858  |
| 1 | -1.169870 | -0.183659 | 1.836459  |
| 1 | 2.245034  | 1.010484  | -0.492649 |
| 8 | 2.209934  | 2.029930  | -0.531911 |
| 1 | 1.074662  | 2.075703  | -0.571503 |
| 1 | 2.592251  | 2.311475  | -1.380865 |

**TS11**

|    |           |           |           |
|----|-----------|-----------|-----------|
| 8  | -0.261964 | -1.798781 | -2.018072 |
| 23 | 0.729519  | -1.191568 | -0.554981 |
| 8  | -0.296443 | 0.350171  | -0.276623 |
| 8  | 2.316495  | -0.097088 | -0.474243 |
| 8  | 0.194614  | -2.577064 | 0.412447  |
| 8  | 1.336629  | -1.963384 | 0.957753  |
| 8  | 1.123421  | -1.535588 | -2.228089 |
| 1  | 1.944513  | 1.434966  | -0.471430 |
| 8  | 3.314127  | -0.281976 | 0.504259  |
| 1  | 2.821247  | -0.304656 | 1.342840  |
| 8  | 1.250012  | 2.168443  | -0.337190 |
| 1  | 0.378408  | 1.459010  | -0.320001 |
| 1  | -1.153453 | 0.360722  | -0.732510 |
| 1  | 1.226566  | 2.724774  | -1.135641 |

**TS12**

|    |           |           |           |
|----|-----------|-----------|-----------|
| 23 | 0.440605  | -0.790643 | 0.202787  |
| 8  | -0.463227 | 0.891055  | 0.615723  |
| 8  | 0.841807  | -2.165659 | 1.375954  |
| 8  | 2.079860  | 0.260389  | 0.675807  |
| 8  | -1.456439 | -1.742276 | 0.306471  |
| 8  | 0.800450  | -1.010703 | -1.333765 |
| 1  | -1.924733 | -1.909598 | -0.524993 |
| 1  | -1.306867 | -2.609199 | 0.716441  |
| 8  | 3.235550  | -0.177728 | -0.033912 |
| 1  | 1.852900  | 1.501480  | 0.475580  |
| 1  | 1.705048  | -2.106139 | 1.800465  |
| 1  | 2.852586  | -0.443767 | -0.890098 |
| 8  | 1.276120  | 2.488055  | 0.423953  |
| 1  | 0.295020  | 1.894468  | 0.477380  |
| 1  | 1.373054  | 2.871644  | -0.458283 |
| 1  | -1.417714 | 0.994090  | 0.544620  |

**TS13**

|    |           |           |           |
|----|-----------|-----------|-----------|
| 8  | 2.026390  | 0.552842  | 0.125397  |
| 23 | 0.326048  | -0.397970 | 0.992236  |
| 8  | 0.556770  | -1.009224 | 2.438057  |
| 8  | 0.597827  | -1.855147 | -0.453008 |
| 8  | -0.551819 | 1.240381  | 0.834659  |
| 1  | 1.426323  | -2.353681 | -0.530472 |
| 8  | -1.351986 | 0.104988  | 0.436739  |
| 1  | 2.588282  | 1.062046  | 0.739193  |
| 8  | 1.492563  | 1.553214  | -0.746015 |
| 1  | -0.121636 | -2.471552 | -0.659911 |

|   |          |          |           |
|---|----------|----------|-----------|
| 1 | 0.592218 | 1.686043 | -0.318406 |
|---|----------|----------|-----------|

**TS14**

|    |           |           |           |
|----|-----------|-----------|-----------|
| 23 | -1.035190 | -0.611925 | 0.041061  |
| 8  | -1.537912 | -1.750027 | -0.944092 |
| 8  | 0.914638  | -0.103069 | -0.069033 |
| 8  | -2.218012 | 0.619585  | 0.743245  |
| 8  | -1.553907 | 1.175040  | -0.413972 |
| 1  | 0.932771  | 1.124147  | 0.105933  |
| 8  | 1.783980  | -0.702073 | 0.897796  |
| 8  | -0.530104 | -1.549335 | 1.815995  |
| 1  | 0.440061  | -1.663536 | 1.835557  |
| 1  | -0.942730 | -2.385855 | 2.076090  |
| 1  | 2.414770  | -1.172402 | 0.327128  |
| 8  | 0.557219  | 2.227803  | 0.232283  |
| 1  | -0.452500 | 1.968513  | -0.025839 |
| 1  | 0.919536  | 2.806184  | -0.456280 |

**TS15**

|    |           |           |           |
|----|-----------|-----------|-----------|
| 8  | -1.229396 | 0.098008  | 0.575849  |
| 23 | 0.015554  | -0.810281 | -0.329456 |
| 8  | 0.730627  | -1.502843 | 1.540934  |
| 8  | 1.552537  | 0.393843  | -0.490554 |
| 8  | 0.045858  | -2.494725 | -0.917467 |
| 8  | -0.112642 | -1.574385 | -2.009661 |
| 8  | -1.184845 | 0.690595  | -0.729340 |
| 1  | 1.194540  | 1.545502  | -0.477337 |
| 8  | 2.702195  | 0.205576  | 0.323988  |
| 1  | 1.161189  | -2.372663 | 1.553511  |
| 1  | 2.340577  | 0.204559  | 1.227714  |
| 1  | 0.094699  | -1.506402 | 2.273691  |
| 8  | 0.475818  | 2.504318  | -0.462857 |
| 1  | -0.380077 | 1.904962  | -0.594741 |
| 1  | 0.595898  | 3.047085  | -1.257426 |

**TS17**

|    |           |           |           |
|----|-----------|-----------|-----------|
| 23 | 0.122168  | -0.264955 | -0.211152 |
| 8  | 1.747700  | -1.249134 | -1.018250 |
| 8  | 0.114283  | -0.996851 | 1.195099  |
| 8  | -0.957424 | -0.878637 | -1.570558 |
| 8  | 1.086058  | 1.171457  | -0.229055 |
| 1  | 2.418122  | -0.503631 | -0.903558 |
| 8  | -1.555928 | 1.009960  | 0.071951  |
| 8  | 2.795706  | 1.013134  | -0.651056 |
| 1  | 2.057934  | -2.007308 | -0.504977 |
| 1  | -0.975614 | -1.825337 | -1.753128 |
| 1  | 3.094299  | 1.160631  | 0.261491  |
| 1  | -1.373871 | 1.960675  | 0.024784  |
| 1  | -2.179964 | 0.808297  | -0.643581 |

**TS18**

|    |           |           |           |
|----|-----------|-----------|-----------|
| 23 | 0.222757  | -0.739026 | 0.069873  |
| 8  | 0.394220  | -1.457047 | 1.678169  |
| 8  | 0.583280  | 0.888686  | -0.031149 |
| 8  | -0.180107 | -1.706397 | -1.412357 |
| 8  | 1.220443  | -1.576520 | -1.169055 |
| 8  | 2.295181  | 1.080096  | 0.068523  |
| 8  | -1.800400 | -0.301297 | 0.217086  |

|   |           |           |           |
|---|-----------|-----------|-----------|
| 1 | -2.411123 | -1.022671 | -0.007719 |
| 1 | -2.104972 | 0.471342  | -0.286213 |
| 1 | 2.430968  | 1.060848  | -0.894961 |
| 1 | 0.378513  | -0.930533 | 2.489481  |

**TS19**

|    |           |           |           |
|----|-----------|-----------|-----------|
| 8  | -0.210310 | -1.283926 | 1.386955  |
| 23 | -0.021289 | -0.399428 | -0.210826 |
| 8  | 1.924862  | -1.056251 | -0.278696 |
| 8  | 0.554405  | 1.184419  | -0.010362 |
| 8  | -0.153614 | -0.966013 | -1.923831 |
| 8  | -1.377725 | -0.471075 | -1.400726 |
| 8  | -1.335656 | -0.394361 | 1.394864  |
| 8  | 2.205606  | 1.469877  | -0.152323 |
| 1  | 2.387510  | -0.172779 | -0.258092 |
| 1  | 2.316392  | 1.825753  | 0.746564  |
| 1  | 2.209703  | -1.526144 | -1.076941 |
| 1  | -1.086795 | 0.287918  | 2.051166  |

**TS20**

|    |           |           |           |
|----|-----------|-----------|-----------|
| 8  | -0.372154 | 0.170651  | 0.721988  |
| 23 | 0.817480  | 0.513479  | -0.462768 |
| 8  | 0.257797  | 0.337951  | -1.927049 |
| 8  | 1.780406  | -1.172715 | 0.057798  |
| 8  | 1.304964  | 2.369270  | -0.188863 |
| 8  | 2.399440  | 1.663541  | -0.138114 |
| 8  | -0.378568 | -1.474660 | 1.312386  |
| 1  | -0.329747 | -1.210195 | 2.247670  |
| 1  | 1.056930  | -1.595718 | 0.622242  |
| 1  | 2.078501  | -1.801022 | -0.618072 |

**TS21**

|    |           |           |           |
|----|-----------|-----------|-----------|
| 8  | 0.994676  | -0.792182 | -2.147359 |
| 23 | 0.575318  | -0.378608 | -0.296379 |
| 8  | -0.592330 | 1.185809  | -1.047409 |
| 8  | 1.800361  | 0.593173  | 0.242458  |
| 8  | -0.724083 | -0.501007 | 0.939578  |
| 8  | 0.196144  | -1.578929 | 1.028896  |
| 8  | 1.495653  | -1.708899 | -1.374102 |
| 8  | 3.107430  | -0.212981 | 1.007230  |
| 1  | -0.135678 | 1.933983  | -1.465491 |
| 1  | 2.683282  | -0.234703 | 1.883229  |
| 1  | -1.222533 | 1.572503  | -0.418761 |

**TS22**

|    |           |           |           |
|----|-----------|-----------|-----------|
| 8  | -1.038410 | -0.028331 | 0.957491  |
| 23 | 0.454099  | 0.993559  | 0.414385  |
| 8  | 0.036500  | 2.488572  | 0.251872  |
| 8  | 0.531563  | 0.084164  | -1.164447 |
| 8  | 1.601287  | 0.761326  | 1.992864  |
| 1  | 0.919164  | 0.475748  | -1.957249 |
| 8  | 2.348138  | 0.888500  | 0.934802  |
| 8  | -1.886685 | -0.888076 | -0.251928 |
| 1  | -1.820082 | 0.440348  | 1.301704  |
| 1  | -1.182910 | -0.726987 | -0.918468 |

**TS23**

|    |           |           |          |
|----|-----------|-----------|----------|
| 8  | -0.514061 | -2.529415 | 0.217861 |
| 23 | 0.882566  | -1.404146 | 0.060454 |



|   |           |           |           |
|---|-----------|-----------|-----------|
| 8 | 1.409880  | -0.868027 | 1.647872  |
| 8 | 1.090025  | 0.365021  | -0.648982 |
| 8 | 2.047407  | -2.900473 | -0.327675 |
| 8 | 2.456749  | -1.833154 | -0.948983 |
| 8 | -0.885235 | -1.198946 | -0.104787 |
| 1 | 0.258402  | 0.837157  | -0.827162 |
| 8 | 1.725047  | 1.666609  | 0.358211  |
| 1 | 1.375328  | -1.503145 | 2.383598  |
| 1 | 1.762132  | 1.108729  | 1.158133  |

**1.1<sup>1</sup>TS24**

|    |           |           |           |
|----|-----------|-----------|-----------|
| 8  | 1.231367  | 2.500685  | 0.488633  |
| 23 | 0.242584  | -0.303578 | -0.851864 |
| 8  | -0.692160 | 0.106776  | -2.044364 |
| 8  | 2.134891  | 0.149014  | -1.137602 |
| 8  | 1.921693  | -1.086068 | -1.477556 |
| 8  | 0.234521  | 2.038334  | -0.004941 |
| 8  | -0.376700 | -0.827414 | 0.738173  |
| 1  | -1.298577 | -0.891130 | 1.018711  |

**3<sup>1</sup>TS24**

|    |           |           |           |
|----|-----------|-----------|-----------|
| 8  | 1.144443  | 1.265676  | -2.125502 |
| 23 | 0.222479  | -0.459466 | -0.002221 |
| 8  | 0.739439  | -0.169828 | 1.439013  |
| 8  | -1.532511 | 0.179559  | -0.264661 |
| 8  | -1.496844 | -1.143339 | -0.024960 |
| 8  | 0.798844  | 1.286862  | -0.941554 |
| 8  | 1.207115  | -1.592306 | -0.915489 |
| 1  | 2.025244  | -1.985249 | -0.570927 |
